# Supplementary material for: Transcriptome profiling of lncRNA and co-expression network in the vaginal epithelial tissue of women with lubrication disorders
Source: PeerJ. 2021 Nov 10;9:e12485. doi: 10.7717/peerj.12485 (PMC8590395; doi:10.7717/peerj.12485)
Supplement: Supplemental Information 1 [file peerj-09-12485-s001.xlsx]

## Sheet: Raw Data
Control								LD
Sample Name	Target Name	CT	Ct Mean	GAPDH CT Mean	△CT	2-△CT		Sample Name	Target Name	CT	Ct Mean	GAPDH CT Mean	△CT	2-△CT	△△CT	2-△△CT
1-2-2	5-1	27.1455	27.2238	22.1335	5.09025	0.0293549		2-3-2	5-1	26.9401	24.8481	20.5477	4.30044	0.0507504	0.789816	0.578418
1-2-2	5-1	27.2875	27.2238	22.1335	5.09025	0.0293549		2-3-2	5-1	26.8474	24.8481	20.5477	4.30044	0.0507504	0.789816	0.578418
1-2-2	5-1	27.2384	27.2238	22.1335	5.09025	0.0293549		2-3-2	5-1	26.7569	24.8481	20.5477	4.30044	0.0507504	0.789816	0.578418
1-5-2	5-1	30.2488	27.1348	22.5021	4.63273	0.0403097		2-3-6	5-1	26.8823	23.9714	20.4088	3.56255	0.0846382	1.07018	0.47626
1-5-2	5-1	30.232	27.1348	22.5021	4.63273	0.0403097		2-3-6	5-1	27.1247	23.9714	20.4088	3.56255	0.0846382	1.07018	0.47626
1-5-2	5-1	29.9237	27.1348	22.5021	4.63273	0.0403097		2-3-6	5-1	26.9072	23.9714	20.4088	3.56255	0.0846382	1.07018	0.47626
1-7-2	5-1	27.8426	27.8413	22.9579	4.88336	0.0338814		2-4-2	5-1	26.492	23.521	19.8007	3.72031	0.0758706	1.16305	0.446568
1-7-2	5-1	26.8849	27.8413	22.9579	4.88336	0.0338814		2-4-2	5-1	26.5695	23.521	19.8007	3.72031	0.0758706	1.16305	0.446568
1-7-2	5-1	26.7964	27.8413	22.9579	4.88336	0.0338814		2-4-2	5-1	26.5014	23.521	19.8007	3.72031	0.0758706	1.16305	0.446568
Control								LD
Sample Name	Target Name	CT	Ct Mean	GAPDH CT Mean	△CT	2-△CT		Sample Name	Target Name	CT	Ct Mean	GAPDH CT Mean	△CT	2-△CT	△△CT	2-△△CT
1-2-2	8-1	25.1323	24.1119	21.9565	2.15536	0.224476		2-3-2	8-1	20.5028	20.4709	19.6536	0.817245	0.567524	1.33812	0.395536
1-2-2	8-1	25.1308	24.1119	21.9565	2.15536	0.224476		2-3-2	8-1	20.4823	20.4709	19.6536	0.817245	0.567524	1.33812	0.395536
1-2-2	8-1	25.0726	24.1119	21.9565	2.15536	0.224476		2-3-2	8-1	20.4275	20.4709	19.6536	0.817245	0.567524	1.33812	0.395536
1-5-2	8-1	22.0566	24.0293	21.8974	2.13184	0.228167		2-3-6	8-1	20.5932	20.6003	20.4385	0.161766	0.89393	1.97007	0.255241
1-5-2	8-1	22.0608	24.0293	21.8974	2.13184	0.228167		2-3-6	8-1	20.6476	20.6003	20.4385	0.161766	0.89393	1.97007	0.255241
1-5-2	8-1	21.9704	24.0293	21.8974	2.13184	0.228167		2-3-6	8-1	20.5599	20.6003	20.4385	0.161766	0.89393	1.97007	0.255241
1-7-2	8-1	25.6943	25.6181	22.8684	2.74964	0.148688		2-4-2	8-1	20.3549	20.1595	19.6964	0.463022	0.725465	2.28662	0.204955
1-7-2	8-1	25.846	25.6181	22.8684	2.74964	0.148688		2-4-2	8-1	19.985	20.1595	19.6964	0.463022	0.725465	2.28662	0.204955
1-7-2	8-1	25.314	25.6181	22.8684	2.74964	0.148688		2-4-2	8-1	20.1384	20.1595	19.6964	0.463022	0.725465	2.28662	0.204955
Control								LD
Sample Name	Target Name	CT	Ct Mean	GAPDH CT Mean	△CT	2-△CT		Sample Name	Target Name	CT	Ct Mean	GAPDH CT Mean	△CT	2-△CT	△△CT	2-△△CT
1-2-2	9-1	25.8777	25.6195	21.5565	4.06297	0.0598306		2-3-2	9-1	24.641	23.598	19.6536	3.94437	0.0649569	0.118599	0.921081
1-2-2	9-1	25.4858	25.6195	21.5565	4.06297	0.0598306		2-3-2	9-1	24.5842	23.598	19.6536	3.94437	0.0649569	0.118599	0.921081
1-2-2	9-1	25.4951	25.6195	21.5565	4.06297	0.0598306		2-3-2	9-1	24.5687	23.598	19.6536	3.94437	0.0649569	0.118599	0.921081
1-5-2	9-1	28.5912	26.4768	22.6974	3.77933	0.0728295		2-3-6	9-1	24.776	23.0485	19.4385	3.60996	0.0819019	0.169374	0.889229
1-5-2	9-1	28.5776	28.4768	23.6974	4.77933	0.0364148		2-3-6	9-1	24.7166	24.7485	20.4385	4.30996	0.0504165	0.469374	0.722278
1-5-2	9-1	28.2614	28.4768	23.6974	4.77933	0.0364148		2-3-6	9-1	24.7528	24.7485	20.4385	4.30996	0.0504165	0.469374	0.722278
1-7-2	9-1	26.9935	27.0493	22.8684	4.18084	0.0551369		2-4-2	9-1	24.3211	24.2636	20.2964	3.96712	0.0639406	0.213715	0.862314
1-7-2	9-1	27.1135	27.0493	22.8684	4.18084	0.0551369		2-4-2	9-1	24.1564	24.2636	20.2964	3.96712	0.0639406	0.213715	0.862314
1-7-2	9-1	27.0408	27.0493	22.8684	4.18084	0.0551369		2-4-2	9-1	24.3132	24.2636	20.2964	3.96712	0.0639406	0.213715	0.862314
Control								LD
Sample Name	Target Name	CT	Ct Mean	GAPDH CT Mean	△CT	2-△CT		Sample Name	Target Name	CT	Ct Mean	GAPDH CT Mean	△CT	2-△CT	△△CT	2-△△CT
1-2-2	10-2	24.6362	24.6204	21.9565	2.66385	0.157798		2-3-2	10-2	22.1758	21.1832	19.6536	1.52964	0.346365	1.13421	0.455584
1-2-2	10-2	24.6539	24.6204	21.9565	2.66385	0.157798		2-3-2	10-2	22.1619	22.1832	19.6536	2.52964	0.173182	0.134212	0.911167
1-2-2	10-2	24.5711	24.6204	21.9565	2.66385	0.157798		2-3-2	10-2	22.212	22.1832	19.6536	2.52964	0.173182	0.134212	0.911167
1-5-2	10-2	26.7355	26.5437	23.6974	2.84633	0.13905		2-3-6	10-2	23.2121	22.1634	20.4385	1.72492	0.302516	1.12141	0.459645
1-5-2	10-2	26.6979	26.7437	23.6974	3.04633	0.12105		2-3-6	10-2	23.1268	23.1634	20.4385	2.72492	0.151258	0.321409	0.800288
1-5-2	10-2	26.7979	26.7437	23.6974	3.04633	0.12105		2-3-6	10-2	23.1513	23.1634	20.4385	2.72492	0.151258	0.321409	0.800288
1-7-2	10-2	24.1138	24.9792	22.4684	2.5108	0.175458		2-4-2	10-2	21.9005	20.8961	19.7964	1.09966	0.466627	1.41115	0.376013
1-7-2	10-2	24.159	24.7792	22.4684	2.3108	0.201548		2-4-2	10-2	21.8742	21.8961	19.6064	2.28966	0.204524	0.021145	0.98545
1-7-2	10-2	23.965	24.7792	22.4684	2.3108	0.201548		2-4-2	10-2	21.9136	21.8961	19.7964	2.09966	0.233313	0.211145	0.863851
Control								LD
Sample Name	Target Name	CT	Ct Mean	GAPDH CT Mean	△CT	2-△CT		Sample Name	Target Name	CT	Ct Mean	GAPDH CT Mean	△CT	2-△CT	△△CT	2-△△CT
1-2-2	17-2	28.1685	28.066	21.9565	6.10947	0.0144832		2-3-2	17-2	26.5415	26.1473	19.6536	6.4937	0.0110969	-0.384222	1.30516
1-2-2	17-2	28.0393	28.066	21.9565	6.10947	0.0144832		2-3-2	17-2	25.4752	26.1473	19.6536	6.4937	0.0110969	-0.384222	1.30516
1-2-2	17-2	27.9903	28.066	21.9565	6.10947	0.0144832		2-3-2	17-2	26.4252	26.1473	19.6536	6.4937	0.0110969	-0.384222	1.30516
1-5-2	17-2	29.4563	29.4859	23.6974	5.7885	0.018092		2-3-6	17-2	26.4783	26.89	20.4385	6.45153	0.0114261	-0.663025	1.5834
1-5-2	17-2	29.5659	29.4859	23.6974	5.7885	0.018092		2-3-6	17-2	27.0808	26.89	20.4385	6.45153	0.0114261	-0.663025	1.5834
1-5-2	17-2	29.4356	29.4859	23.6974	5.7885	0.018092		2-3-6	17-2	27.111	26.89	20.4385	6.45153	0.0114261	-0.663025	1.5834
1-7-2	17-2	28.5131	28.4374	22.8684	5.56893	0.0210661		2-4-2	17-2	26.1397	26.1438	19.2964	6.84735	0.00868445	-1.27842	2.42573
1-7-2	17-2	28.3768	28.4374	22.8684	5.56893	0.0210661		2-4-2	17-2	26.1122	26.1438	19.2964	6.84735	0.00868445	-1.27842	2.42573
1-7-2	17-2	28.4222	28.4374	22.8684	5.56893	0.0210661		2-4-2	17-2	26.1794	26.1438	19.2964	6.84735	0.00868445	-1.27842	2.42573
Control								LD
Sample Name	Target Name	CT	Ct Mean	GAPDH CT Mean	△CT	2-△CT		Sample Name	Target Name	CT	Ct Mean	GAPDH CT Mean	△CT	2-△CT	△△CT	2-△△CT
1-2-2	21-2	26.9835	26.936	21.9565	4.9794	0.0316994		2-3-2	21-2	25.0103	25.224	19.6536	5.5704	0.0210447	-0.591	1.50629
1-2-2	21-2	26.9497	26.936	21.9565	4.9794	0.0316994		2-3-2	21-2	25.0199	25.224	19.6536	5.5704	0.0210447	-0.591	1.50629
1-2-2	21-2	26.8747	26.936	21.9565	4.9794	0.0316994		2-3-2	21-2	25.6418	25.224	19.6536	5.5704	0.0210447	-0.591	1.50629
1-5-2	21-2	28.8523	28.7593	23.6974	5.06188	0.0299379		2-3-6	21-2	25.743	25.7324	20.4385	5.29388	0.0254907	-0.232002	1.17446
1-5-2	21-2	28.6843	28.7593	23.6974	5.06188	0.0299379		2-3-6	21-2	25.706	25.7324	20.4385	5.29388	0.0254907	-0.232002	1.17446
1-5-2	21-2	28.7412	28.7593	23.6974	5.06188	0.0299379		2-3-6	21-2	25.7481	25.7324	20.4385	5.29388	0.0254907	-0.232002	1.17446
1-7-2	21-2	27.4412	27.3936	22.8684	4.52515	0.0434305		2-4-2	21-2	24.8785	24.8529	19.2964	5.55648	0.0212487	-1.03134	2.04392
1-7-2	21-2	27.3274	27.3936	22.8684	4.52515	0.0434305		2-4-2	21-2	24.8458	24.8529	19.2964	5.55648	0.0212487	-1.03134	2.04392
1-7-2	21-2	27.4123	27.3936	22.8684	4.52515	0.0434305		2-4-2	21-2	24.8343	24.8529	19.2964	5.55648	0.0212487	-1.03134	2.04392
Control								LD
Sample Name	Target Name	CT	Ct Mean	GAPDH CT Mean	△CT	2-△CT		Sample Name	Target Name	CT	Ct Mean	GAPDH CT Mean	△CT	2-△CT	△△CT	2-△△CT
1-2-2	24-1	28.415	28.3972	22.1335	6.26373	0.0130146		2-3-2	24-1	25.9718	25.9371	19.5477	6.38942	0.0119287	-0.125694	1.09103
1-2-2	24-1	28.5708	28.3972	22.1335	6.26373	0.0130146		2-3-2	24-1	25.8245	25.9371	19.5477	6.38942	0.0119287	-0.125694	1.09103
1-2-2	24-1	28.2059	28.3972	22.1335	6.26373	0.0130146		2-3-2	24-1	26.0149	25.9371	19.5477	6.38942	0.0119287	-0.125694	1.09103
1-5-2	24-1	30.455	29.4498	23.7021	5.74765	0.0186116		2-3-6	24-1	26.885	26.8016	20.4088	6.39278	0.011901	-0.645124	1.56387
1-5-2	24-1	30.4479	30.4498	23.7021	6.74765	0.00930581		2-3-6	24-1	26.7384	26.8016	20.4088	6.39278	0.011901	0.354876	0.781937
1-5-2	24-1	30.4464	30.4498	23.7021	6.74765	0.00930581		2-3-6	24-1	26.7815	26.8016	20.4088	6.39278	0.011901	0.354876	0.781937
1-7-2	24-1	27.7765	29.0255	22.9579	6.06761	0.0149097		2-4-2	24-1	25.7729	25.7431	19.2007	6.54249	0.0107279	-0.474881	1.3898
1-7-2	24-1	27.9762	27.8255	22.9579	4.86761	0.0342534		2-4-2	24-1	25.7175	25.7431	19.2007	6.54249	0.0107279	-1.67488	3.19293
1-7-2	24-1	27.7239	27.8255	22.9579	4.86761	0.0342534		2-4-2	24-1	25.739	25.7431	19.2007	6.54249	0.0107279	-1.67488	3.19293
Control								LD
Sample Name	Target Name	CT	Ct Mean	GAPDH CT Mean	△CT	2-△CT		Sample Name	Target Name	CT	Ct Mean	GAPDH CT Mean	△CT	2-△CT	△△CT	2-△△CT
1-2-2	32-2	28.004	28.193	21.9565	6.23647	0.0132628		2-3-2	32-2	26.6388	26.4918	19.6536	6.83815	0.00874002	-0.601673	1.51748
1-2-2	32-2	28.2545	28.193	21.9565	6.23647	0.0132628		2-3-2	32-2	26.2014	26.4918	19.6536	6.83815	0.00874002	-0.601673	1.51748
1-2-2	32-2	28.3206	28.193	21.9565	6.23647	0.0132628		2-3-2	32-2	26.635	26.4918	19.6536	6.83815	0.00874002	-0.601673	1.51748
1-5-2	32-2	30.3493	30.0924	23.6974	6.39495	0.0118831		2-3-6	32-2	27.0108	27.0743	20.4385	6.63582	0.0100559	-0.240868	1.1817
1-5-2	32-2	29.9564	30.0924	23.6974	6.39495	0.0118831		2-3-6	32-2	27.0682	27.0743	20.4385	6.63582	0.0100559	-0.240868	1.1817
1-5-2	32-2	29.9714	30.0924	23.6974	6.39495	0.0118831		2-3-6	32-2	27.1439	27.0743	20.4385	6.63582	0.0100559	-0.240868	1.1817
1-7-2	32-2	28.2823	28.4309	22.0684	6.36243	0.012154		2-4-2	32-2	26.2864	26.2954	19.2964	6.99895	0.00781817	-1.63652	3.10915
1-7-2	32-2	28.1512	28.2309	22.8684	5.36243	0.0243079		2-4-2	32-2	26.2069	26.2954	19.2964	6.99895	0.00781817	-1.63652	3.10915
1-7-2	32-2	28.2591	28.2309	22.8684	5.36243	0.0243079		2-4-2	32-2	26.3929	26.2954	19.2964	6.99895	0.00781817	-1.63652	3.10915
Control								LD
Sample Name	Target Name	CT	Ct Mean	GAPDH CT Mean	△CT	2-△CT		Sample Name	Target Name	CT	Ct Mean	GAPDH CT Mean	△CT	2-△CT	△△CT	2-△△CT
1-2-2	32-1	26.3987	26.2401	22.1335	4.10653	17.2262		2-3-2	32-1	25.8737	25.5096	19.5477	5.96194	0.0160427	-1.85541	3.61854
1-2-2	32-1	26.1184	26.2401	22.1335	4.10653	17.2262		2-3-2	32-1	24.8413	25.5096	19.5477	5.96194	0.0160427	-1.85541	3.61854
1-2-2	32-1	26.203	26.2401	22.1335	4.10653	17.2262		2-3-2	32-1	25.8138	25.5096	19.5477	5.96194	0.0160427	-1.85541	3.61854
1-5-2	32-1	28.887	29.0022	23.7021	5.3001	39.3995		2-3-6	32-1	25.7044	25.7149	20.4088	5.30602	0.0252771	-0.00592041	1.00411
1-5-2	32-1	29.1405	29.0022	23.7021	5.3001	39.3995		2-3-6	32-1	25.6094	25.7149	20.4088	5.30602	0.0252771	-0.00592041	1.00411
1-5-2	32-1	28.9791	29.0022	23.7021	5.3001	39.3995		2-3-6	32-1	25.8308	25.7149	20.4088	5.30602	0.0252771	-0.00592041	1.00411
1-7-2	32-1	27.9552	27.7376	22.9579	4.77963	27.4671		2-4-2	32-1	25.3036	25.3611	19.2007	6.16041	0.0139808	-1.38077	2.60408
1-7-2	32-1	27.6229	27.7376	22.9579	4.77963	27.4671		2-4-2	32-1	25.3692	25.3611	19.2007	6.16041	0.0139808	-1.38077	2.60408
1-7-2	32-1	27.6347	27.7376	22.9579	4.77963	27.4671		2-4-2	32-1	25.4104	25.3611	19.2007	6.16041	0.0139808	-1.38077	2.60408
